# Supplementary material for: Separation and purification of short-, medium-, and long-stranded RNAs by RP-HPLC using different mobile phases and C18 columns with various pore sizes
Source: Royal Society of Chemistry journal article supplement (doi:10.1039/d4ay00114a), 2024-01-01
Supplement: d4ay00114a1.pdf [file d4ay00114a1.pdf]

## Supplementary information

# Separation and Purification of Short-, Middle-, and Long-Stranded RNAs by RP-HPLC Using Different Mobile Phases and C<sub>18</sub> Columns with Various Pore Sizes

Makoto Ozaki,<sup>a‡</sup> Tomomi Kuwayama,<sup>a‡</sup> Motoshi Shimotsuma,<sup>a</sup> and Tsunehisa Hirose<sup>\*a</sup>

<sup>a</sup> Purification Section, Research and Development Department, Nacalai Tesque, Inc.,  
Ishibashi Kaide-cho, Muko-shi, Kyoto 617-0004, Japan

<sup>‡</sup>These authors contributed equally to this work.

\*Corresponding author

E-mail: [hirose-t@nacalai.co.jp](mailto:hirose-t@nacalai.co.jp) (T. Hirose)

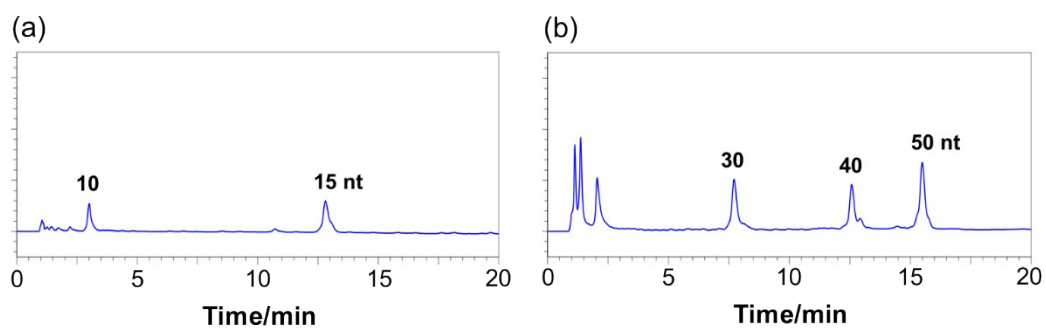

**Fig. S1** HPLC chromatograms of poly(dA<sub>10-50</sub>) using a C<sub>18</sub> column with normal pore. HPLC was performed using a COSMOCORE 2.6C<sub>18</sub> column (2.1 mm I.D. × 100 mm) with 100 mM HFIP-15 mM HA using a linear gradient from (a) 20% to 30% (0–20 min) and 30% to 40% (0–20 min) with MeCN/MeOH (50/50, v/v) for 20 min at a flow rate of 0.2 mL/min at 65 °C. UV detection was performed at 260 nm.

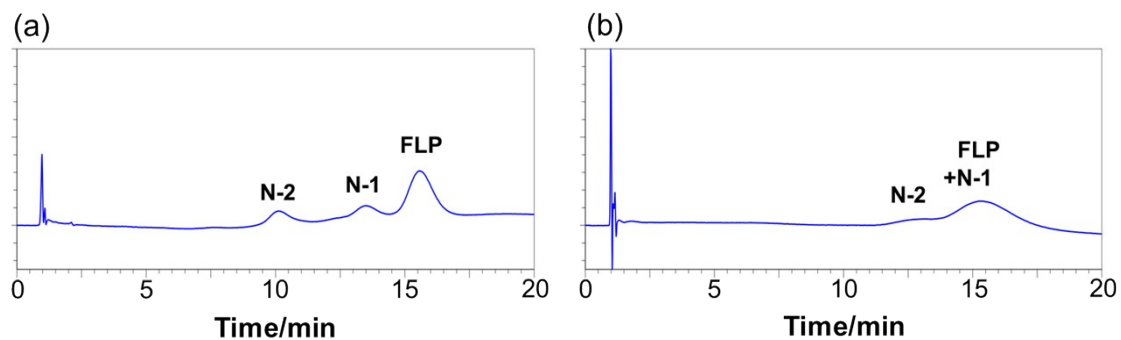

**Fig. S2** HPLC chromatograms of Ampr Left2 20S (FLP), 19S (N-1), and 18S (N-2) using a C<sub>18</sub> column with normal pore. HPLC was performed using a COSMOCORE 2.6C<sub>18</sub> column (2.1 mm I.D. × 100 mm) with (a) 100 mM HFIP-15 mM HA and (b) 100 mM TEAA as solvent A using a linear gradient from (a) 29% to 32% (0–20 min) and (b) 33% to 39% (0–20 min) with (a) MeOH/MeCN (50/50, v/v) and (b) solvent A/MeOH/MeCN (50/25/25, v/v/v) as solvent B at a flow rate of 0.2 mL/min at 65 °C. UV detection was performed at 260 nm.

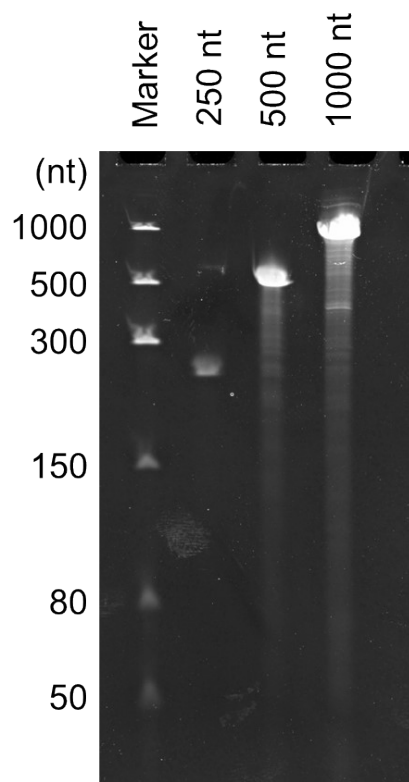

**Fig. S3** Native PAGE image of the 250, 500, and 1000 nt RNAs synthesized by *in vitro* transcription.

**Table S1** Half-width ( $W_{1/2}$ ) and symmetry factor ( $S$ ) values of the different mobile phases of 250, 500, and 1000 nt ssRNAs synthesized by *in vitro* transcription

|                                           | $W_{1/2\ 250\ \text{nt}}$ | $W_{1/2\ 500\ \text{nt}}$ | $W_{1/2\ 1000\ \text{nt}}$ | $S_{250\ \text{nt}}$ | $S_{500\ \text{nt}}$ | $S_{1000\ \text{nt}}$ |
|-------------------------------------------|---------------------------|---------------------------|----------------------------|----------------------|----------------------|-----------------------|
| Solvent A: TEAA-PB<br>Solvent B: MeCN     | 0.21                      | 0.17                      | 0.18                       | 1.54                 | 1.22                 | 1.45                  |
| Solvent A: HFIP-TEA-PB<br>Solvent B: MeOH | 0.33                      | 0.35                      | 0.34                       | 1.02                 | 0.86                 | 0.90                  |
| Solvent A: TEAA<br>Solvent B: MeCN        | 0.31                      | 0.25                      | 0.26                       | 2.27                 | 1.58                 | 1.59                  |
| Solvent A: HFIP-TEA<br>Solvent B: MeOH    | 0.40                      | 0.42                      | 0.46                       | 1.43                 | 1.11                 | 1.23                  |
